# Supplementary material for: Meta-analysis: the molecular organization of non-fullerene acceptors
Source: Royal Society of Chemistry journal article supplement (doi:10.1039/c9mh01439j), 2019-11-18
Supplement: c9mh01439j1.pdf [file c9mh01439j1.pdf]

## Supporting Information:

### Meta-analysis: the molecular organization of non-fullerene acceptors

Pierluigi Mondelli,<sup>a</sup> Gabriele Boschetto,<sup>b</sup> Peter N. Horton,<sup>c</sup> Priti Tiwana,<sup>a</sup> Chris-Kriton Skylaris,<sup>b</sup> Simon J. Coles,<sup>c</sup> Michal Krompiec<sup>a</sup> and Graham Morse<sup>a</sup>

<sup>a</sup> Merck Chemicals Ltd, Chilworth Technical Centre, University Parkway, Southampton SO16 7QD, UK. Email: graham.morse@merckgroup.com.

<sup>b</sup> School of Chemistry, University of Southampton, Highfield, Southampton, SO17 1BJ, UK.

<sup>c</sup> EPSRC Crystallographic Service, Department of Chemistry, University of Southampton, Highfield, SO17 1BJ, UK.

#### 1. Crystallographic information

Table S1 Crystallographic information of the new crystal structures obtained in this work

| <i>Name</i>                                        | <i>ITIC</i>                                                                  | <i>4TICO</i>                                                                   | <i>m-4TICO</i>                                                                                | <i>m-ITIC</i>                                                                                |
|----------------------------------------------------|------------------------------------------------------------------------------|--------------------------------------------------------------------------------|-----------------------------------------------------------------------------------------------|----------------------------------------------------------------------------------------------|
| <b>CCDC no.</b>                                    | 1942946                                                                      | 1942947                                                                        | 1942948                                                                                       | 1942949                                                                                      |
| <b>Formula</b>                                     | C <sub>94</sub> H <sub>82</sub> N <sub>4</sub> O <sub>2</sub> S <sub>4</sub> | C <sub>104</sub> H <sub>109</sub> N <sub>4</sub> O <sub>8</sub> S <sub>4</sub> | C <sub>100</sub> H <sub>98</sub> Cl <sub>6</sub> N <sub>4</sub> O <sub>6</sub> S <sub>4</sub> | C <sub>95</sub> H <sub>83</sub> Cl <sub>3</sub> N <sub>4</sub> O <sub>2</sub> S <sub>4</sub> |
| <b><i>D</i><sub>calc.</sub>/ g cm<sup>-3</sup></b> | 1.255                                                                        | 1.238                                                                          | 1.322                                                                                         | 1.261                                                                                        |
| <b><i>μ</i>/mm<sup>-1</sup></b>                    | 1.572                                                                        | 1.446                                                                          | 3.060                                                                                         | 2.380                                                                                        |
| <b>Formula Weight</b>                              | 1427.87                                                                      | 1671.19                                                                        | 1792.76                                                                                       | 1547.24                                                                                      |
| <b>Colour</b>                                      | metallic yellow                                                              | black                                                                          | dark red                                                                                      | dark red                                                                                     |
| <b>Shape</b>                                       | needle                                                                       | rod                                                                            | blade                                                                                         | needle                                                                                       |
| <b>Size/mm<sup>3</sup></b>                         | 0.42×0.025×0.01                                                              | 0.21×0.035×0.02                                                                | 0.19×0.06×0.02                                                                                | 0.15×0.03×0.02                                                                               |
| <b><i>T</i>/K</b>                                  | 100(2)                                                                       | 100(2)                                                                         | 100(2)                                                                                        | 100(2)                                                                                       |
| <b>Crystal System</b>                              | triclinic                                                                    | monoclinic                                                                     | triclinic                                                                                     | triclinic                                                                                    |
| <b>Space Group</b>                                 | <i>P</i> 1̄                                                                  | <i>P</i> <sub>2</sub> /c                                                       | <i>P</i> 1̄                                                                                   | <i>P</i> 1̄                                                                                  |
| <b><i>a</i>/Å</b>                                  | 14.9009(7)                                                                   | 15.2836(2)                                                                     | 8.6526(3)                                                                                     | 8.7454(13)                                                                                   |
| <b><i>b</i>/Å</b>                                  | 15.5043(4)                                                                   | 20.0101(5)                                                                     | 16.4878(8)                                                                                    | 18.872(2)                                                                                    |
| <b><i>c</i>/Å</b>                                  | 18.1199(5)                                                                   | 29.3242(6)                                                                     | 18.0435(8)                                                                                    | 25.2647(18)                                                                                  |
| <b><i>α</i>/°</b>                                  | 99.309(2)                                                                    | 90                                                                             | 114.697(5)                                                                                    | 87.770(8)                                                                                    |
| <b><i>β</i>/°</b>                                  | 101.541(3)                                                                   | 89.997(2)                                                                      | 103.822(4)                                                                                    | 88.724(9)                                                                                    |
| <b><i>γ</i>/°</b>                                  | 108.366(3)                                                                   | 90                                                                             | 90.890(4)                                                                                     | 78.001(12)                                                                                   |
| <b><i>V</i>/Å<sup>3</sup></b>                      | 3777.2(2)                                                                    | 8968.1(3)                                                                      | 2251.45(19)                                                                                   | 4075.1(9)                                                                                    |
| <b><i>Z</i></b>                                    | 2                                                                            | 4                                                                              | 1                                                                                             | 2                                                                                            |
| <b><i>Z</i>'</b>                                   | 1                                                                            | 1                                                                              | 0.5                                                                                           | 1                                                                                            |
| <b>Wavelength/Å</b>                                | 1.54178                                                                      | 1.54178                                                                        | 1.54178                                                                                       | 1.54178                                                                                      |
| <b>Radiation type</b>                              | CuK <sub>α</sub>                                                             | CuK <sub>α</sub>                                                               | CuK <sub>α</sub>                                                                              | CuK <sub>α</sub>                                                                             |
| <b><i>θ</i><sub>min</sub>/°</b>                    | 2.565                                                                        | 2.208                                                                          | 2.800                                                                                         | 2.395                                                                                        |
| <b><i>θ</i><sub>max</sub>/°</b>                    | 68.236                                                                       | 66.596                                                                         | 68.239                                                                                        | 58.930                                                                                       |
| <b>Measured Refl.</b>                              | 61232                                                                        | 62183                                                                          | 38283                                                                                         | 43879                                                                                        |
| <b>Independent Refl.</b>                           | 13714                                                                        | 15523                                                                          | 8194                                                                                          | 11657                                                                                        |
| <b>Reflections Used</b>                            | 8924                                                                         | 9046                                                                           | 6638                                                                                          | 4311                                                                                         |
| <b><i>R</i><sub>int</sub></b>                      | 0.1294                                                                       | 0.0953                                                                         | 0.0820                                                                                        | 0.1316                                                                                       |
| <b>Parameters</b>                                  | 941                                                                          | 1174                                                                           | 627                                                                                           | 1028                                                                                         |
| <b>Restraints</b>                                  | 0                                                                            | 2209                                                                           | 588                                                                                           | 1813                                                                                         |
| <b>Largest Peak</b>                                | 0.767                                                                        | 0.692                                                                          | 0.867                                                                                         | 1.146                                                                                        |
| <b>Deepest Hole</b>                                | -0.570                                                                       | -0.559                                                                         | -0.667                                                                                        | -0.668                                                                                       |
| <b>Goof</b>                                        | 1.002                                                                        | 1.044                                                                          | 1.071                                                                                         | 1.450                                                                                        |

|                                  |        |        |        |        |
|----------------------------------|--------|--------|--------|--------|
| <b>wR<sub>2</sub> (all data)</b> | 0.2080 | 0.2842 | 0.2158 | 0.5171 |
| <b>wR<sub>2</sub></b>            | 0.1770 | 0.2395 | 0.2089 | 0.4418 |
| <b>R<sub>1</sub> (all data)</b>  | 0.1126 | 0.1639 | 0.0852 | 0.3079 |
| <b>R<sub>1</sub></b>             | 0.0718 | 0.0998 | 0.0753 | 0.1768 |

| <b>Name</b>                                 | <b>IEICO</b>                                                                                 | <b>IDIC</b>                                                                  | <b>ICA</b>                                        | <b>ICNA</b>                                       | <b>IDT01</b>                                   |
|---------------------------------------------|----------------------------------------------------------------------------------------------|------------------------------------------------------------------------------|---------------------------------------------------|---------------------------------------------------|------------------------------------------------|
| <b>CCDC no.</b>                             | 1942950                                                                                      | 1942951                                                                      | 1942952                                           | 1942953                                           | 1942954                                        |
| <b>Formula</b>                              | C <sub>58</sub> H <sub>60</sub> Cl <sub>3</sub> N <sub>2</sub> O <sub>2</sub> S <sub>2</sub> | C <sub>66</sub> H <sub>66</sub> N <sub>4</sub> O <sub>2</sub> S <sub>2</sub> | C <sub>23</sub> H <sub>20</sub> N <sub>2</sub> OS | C <sub>27</sub> H <sub>22</sub> N <sub>2</sub> OS | C <sub>20</sub> H <sub>18</sub> S <sub>2</sub> |
| <b>D<sub>calc.</sub>/ g cm<sup>-3</sup></b> | 1.260                                                                                        | 1.240                                                                        | 1.325                                             | 1.346                                             | 1.300                                          |
| <b>μ/mm<sup>-1</sup></b>                    | 2.679                                                                                        | 1.272                                                                        | 1.650                                             | 1.546                                             | 0.317                                          |
| <b>Formula Weight</b>                       | 987.55                                                                                       | 1011.34                                                                      | 372.47                                            | 422.52                                            | 322.46                                         |
| <b>Colour</b>                               | black                                                                                        | metallic yellow                                                              | red                                               | dark red                                          | Colourless                                     |
| <b>Shape</b>                                | plate                                                                                        | plate                                                                        | block                                             | rod                                               | block                                          |
| <b>Size/mm<sup>3</sup></b>                  | 0.36×0.18×0.015                                                                              | 0.10×0.06×0.02                                                               | 0.28×0.22×0.08                                    | 0.22×0.04×0.03                                    | 0.20×0.20×0.16                                 |
| <b>T/K</b>                                  | 100(2)                                                                                       | 100(2)                                                                       | 100(2)                                            | 100(2)                                            | 120(2)                                         |
| <b>Crystal System</b>                       | monoclinic                                                                                   | triclinic                                                                    | triclinic                                         | monoclinic                                        | triclinic                                      |
| <b>Space Group</b>                          | C2/c                                                                                         | p $\bar{1}$                                                                  | p $\bar{1}$                                       | P2 <sub>1</sub> /n                                | p $\bar{1}$                                    |
| <b>a/Å</b>                                  | 21.1745(9)                                                                                   | 8.6679(4)                                                                    | 7.71450(10)                                       | 4.8299(2)                                         | 8.4290(2)                                      |
| <b>b/Å</b>                                  | 35.242(2)                                                                                    | 12.5073(7)                                                                   | 10.8650(2)                                        | 24.0080(5)                                        | 9.7140(3)                                      |
| <b>c/Å</b>                                  | 14.1841(9)                                                                                   | 13.5784(6)                                                                   | 12.5062(3)                                        | 17.9904(3)                                        | 11.0760(3)                                     |
| <b>α/°</b>                                  | 90                                                                                           | 72.096(4)                                                                    | 110.002(2)                                        | 90                                                | 82.096(2)                                      |
| <b>β/°</b>                                  | 100.409(4)                                                                                   | 75.545(4)                                                                    | 96.063(2)                                         | 91.295(2)                                         | 69.206(2)                                      |
| <b>γ/°</b>                                  | 90                                                                                           | 88.839(4)                                                                    | 104.290(2)                                        | 90                                                | 76.828(2)                                      |
| <b>V/Å<sup>3</sup></b>                      | 10410.5(10)                                                                                  | 1353.88(12)                                                                  | 933.52(3)                                         | 2085.57(10)                                       | 823.92(4)                                      |
| <b>Z</b>                                    | 8                                                                                            | 1                                                                            | 2                                                 | 4                                                 | 2                                              |
| <b>Z'</b>                                   | 1                                                                                            | 0.5                                                                          | 1                                                 | 1                                                 | 1                                              |
| <b>Wavelength/Å</b>                         | 1.54178                                                                                      | 1.54178                                                                      | 1.54178                                           | 1.54178                                           | 0.71073                                        |
| <b>Radiation type</b>                       | CuK <sub>α</sub>                                                                             | CuK <sub>α</sub>                                                             | CuK <sub>α</sub>                                  | CuK <sub>α</sub>                                  | MoK <sub>α</sub>                               |
| <b>θ<sub>min</sub>/°</b>                    | 3.699                                                                                        | 3.538                                                                        | 3.846                                             | 3.070                                             | 3.066                                          |
| <b>θ<sub>max</sub>/°</b>                    | 68.235                                                                                       | 68.242                                                                       | 68.234                                            | 68.233                                            | 27.603                                         |
| <b>Measured Refl.</b>                       | 28791                                                                                        | 22142                                                                        | 16421                                             | 18627                                             | 19156                                          |
| <b>Independent Refl.</b>                    | 9244                                                                                         | 4925                                                                         | 3390                                              | 3805                                              | 3772                                           |
| <b>Reflections Used</b>                     | 4070                                                                                         | 4117                                                                         | 3349                                              | 3260                                              | 2914                                           |
| <b>R<sub>int</sub></b>                      | 0.1045                                                                                       | 0.0496                                                                       | 0.0193                                            | 0.0428                                            | 0.0688                                         |
| <b>Parameters</b>                           | 716                                                                                          | 336                                                                          | 245                                               | 301                                               | 203                                            |
| <b>Restraints</b>                           | 1314                                                                                         | 0                                                                            | 0                                                 | 3                                                 | 0                                              |
| <b>Largest Peak</b>                         | 0.892                                                                                        | 0.466                                                                        | 0.300                                             | 0.429                                             | 0.316                                          |
| <b>Deepest Hole</b>                         | -0.602                                                                                       | -0.449                                                                       | -0.289                                            | -0.414                                            | -0.392                                         |
| <b>Goof</b>                                 | 1.470                                                                                        | 1.056                                                                        | 1.047                                             | 1.081                                             | 1.055                                          |
| <b>wR<sub>2</sub> (all data)</b>            | 0.4994                                                                                       | 0.1508                                                                       | 0.0761                                            | 0.1478                                            | 0.1155                                         |
| <b>wR<sub>2</sub></b>                       | 0.4321                                                                                       | 0.1441                                                                       | 0.0760                                            | 0.1424                                            | 0.1041                                         |
| <b>R<sub>1</sub> (all data)</b>             | 0.2955                                                                                       | 0.0640                                                                       | 0.0294                                            | 0.0611                                            | 0.0668                                         |
| <b>R<sub>1</sub></b>                        | 0.1903                                                                                       | 0.0545                                                                       | 0.0292                                            | 0.0531                                            | 0.0466                                         |

## 2. Molecular considerations

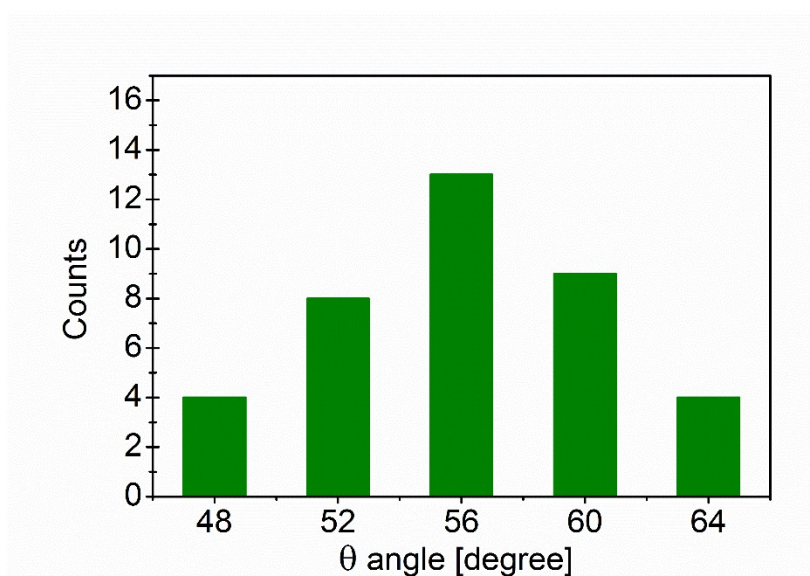

Figure S1 Distribution of the  $\theta$  angle measured for the A-D-A family molecules

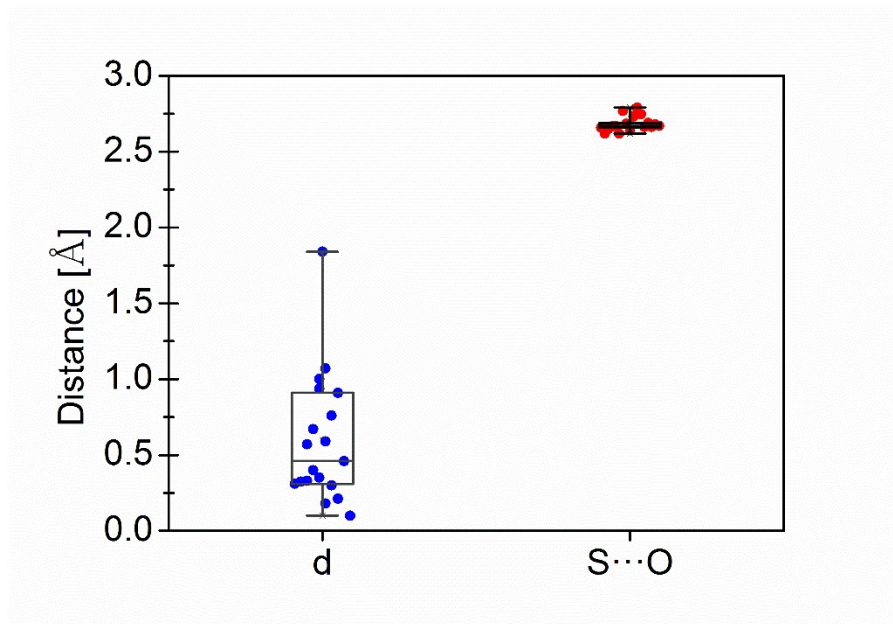

Figure S2  $d$  distances and S...O close contacts measured for the A-D-A crystal structures studied in this work. The box plot denotes median (centre line), 25<sup>th</sup> (bottom edge of the box), 75<sup>th</sup> (top edge of the box), maximum and minimum values

### 3. Topological connectivity and charge transport

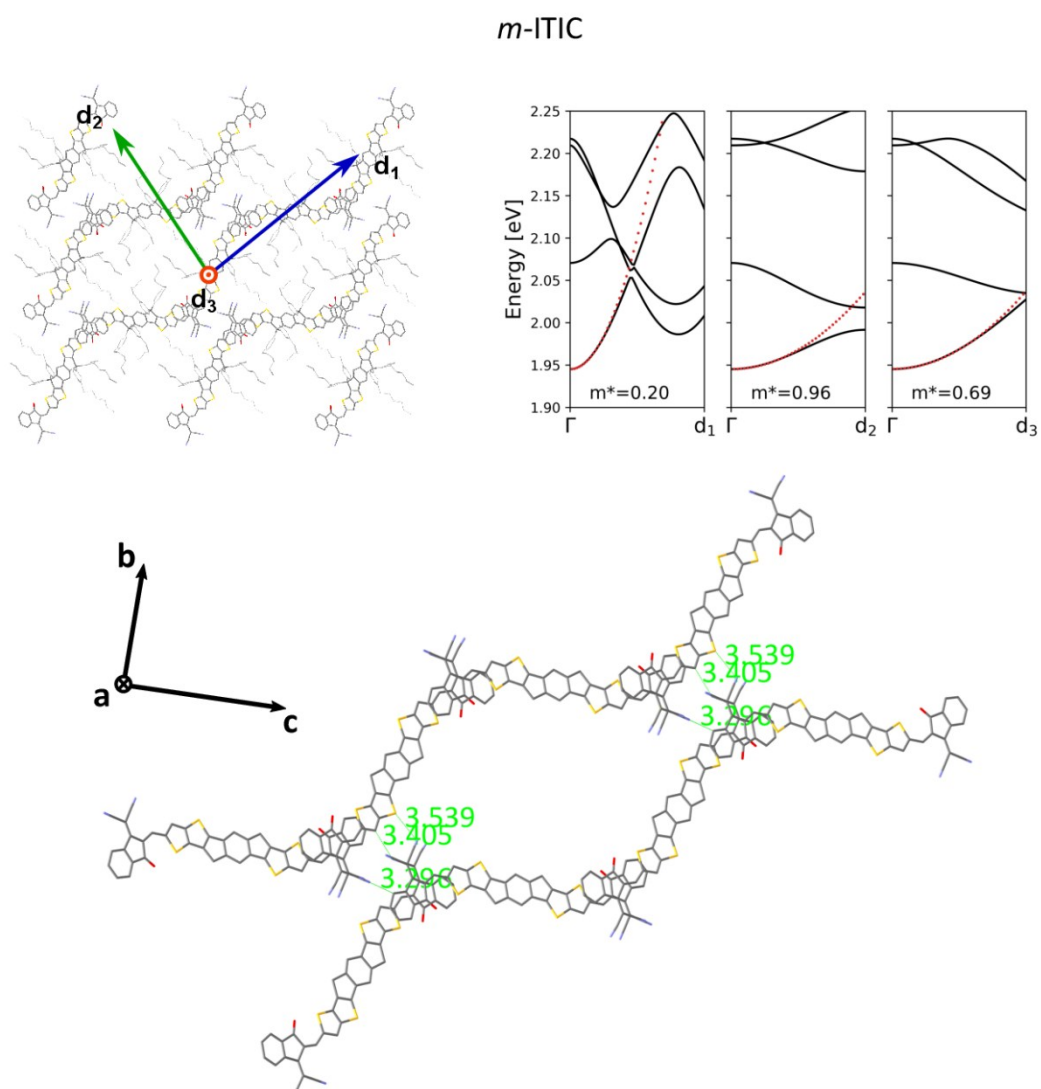

Figure S3 Top: View of the brickwork 2D packing motif of *m*-ITIC with  $d_1$ ,  $d_2$  and  $d_3$  directions superimposed. Calculated conduction band along  $d_1$ ,  $d_2$  and  $d_3$  directions and effective mass are shown. Bottom: shortest close contacts between non-interconnected molecules are drawn in green. Sidechains, solvent inclusions and hydrogen atoms have been omitted for clarity.

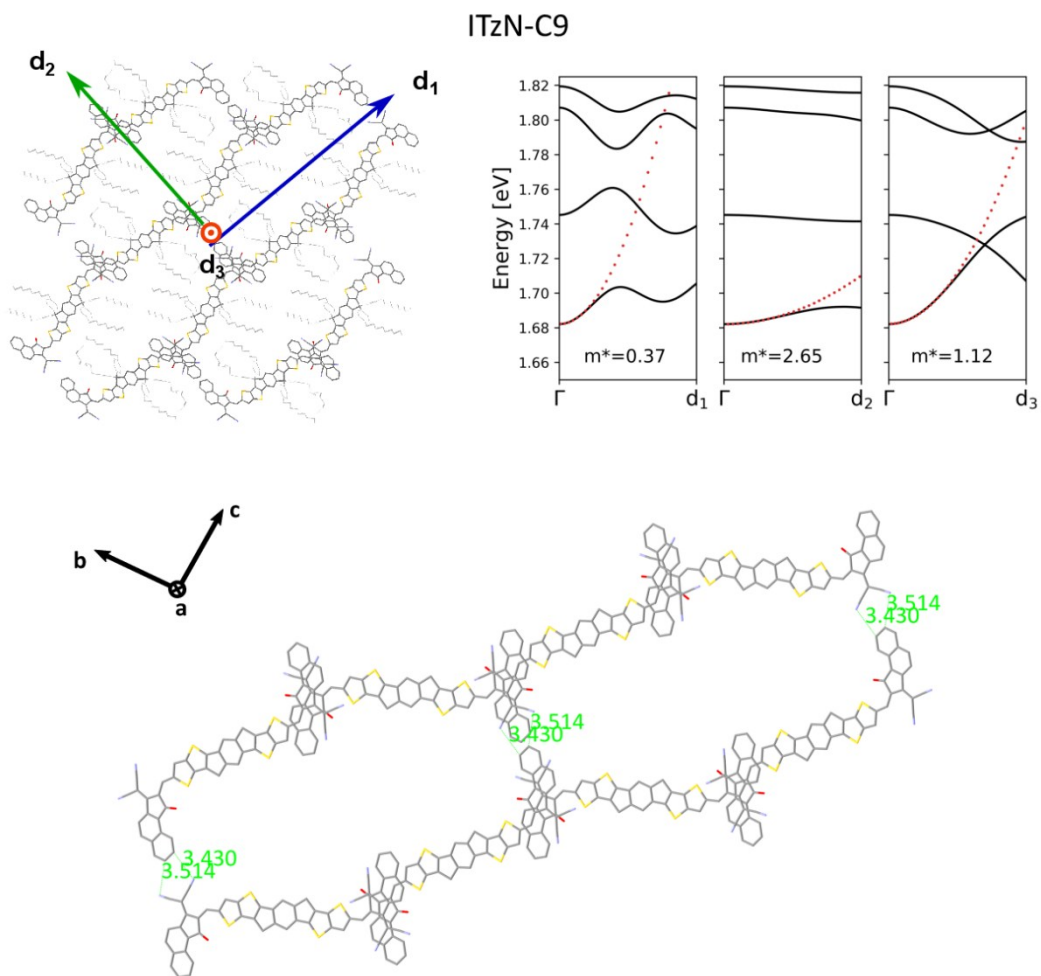

Figure S4 Top: View of the brickwork 2D packing motif of ITzN-C9 with  $d_1$ ,  $d_2$  and  $d_3$  directions superimposed. Calculated conduction band along  $d_1$ ,  $d_2$  and  $d_3$  directions and effective mass are shown. Bottom: shortest close contacts between non-interconnected molecules are drawn in green. Sidechains, solvent inclusions and hydrogen atoms have been omitted for clarity.

## IDIC-4H

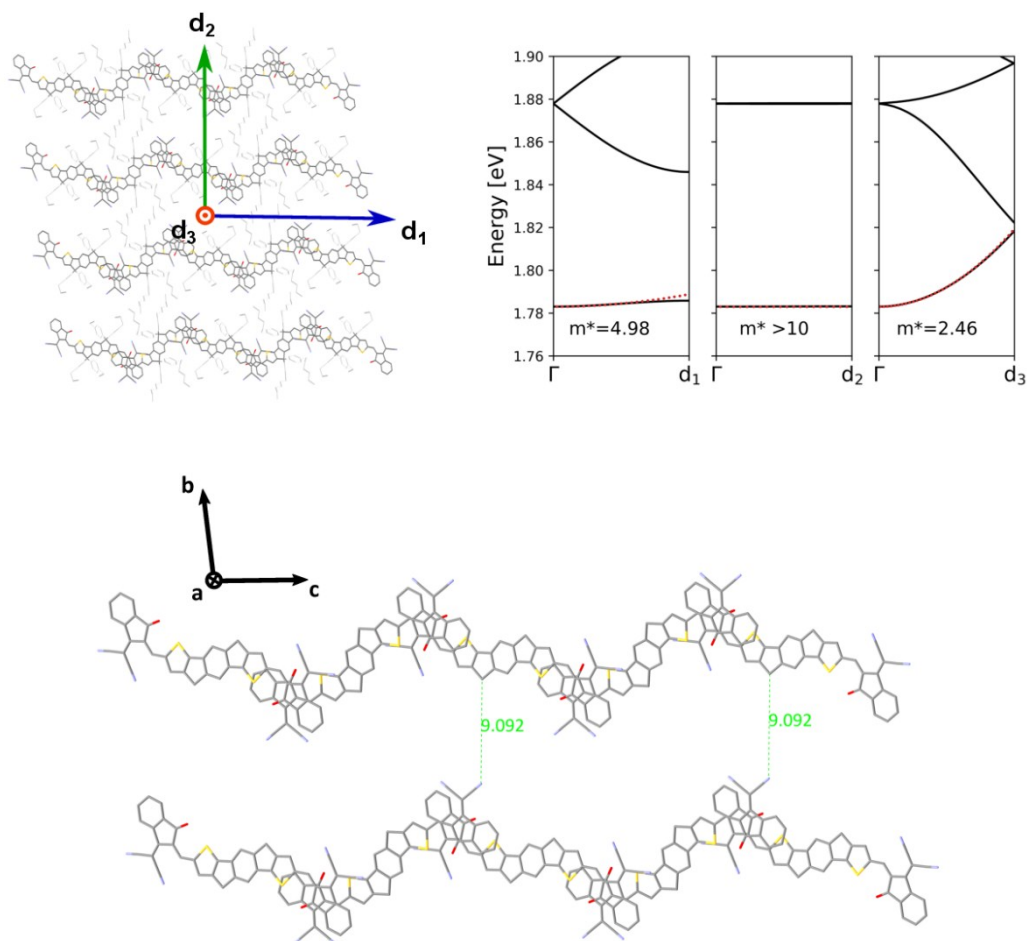

Figure S5 Top: view of the brickwork 2D packing motif of IDIC-4H with  $d_1$ ,  $d_2$  and  $d_3$  directions superimposed. Calculated conduction band along  $d_1$ ,  $d_2$  and  $d_3$  directions and effective mass are shown. Bottom: shortest distances between non-interconnected molecules are drawn in green. Sidechains and hydrogen atoms have been omitted for clarity.

### *m*-4TICO

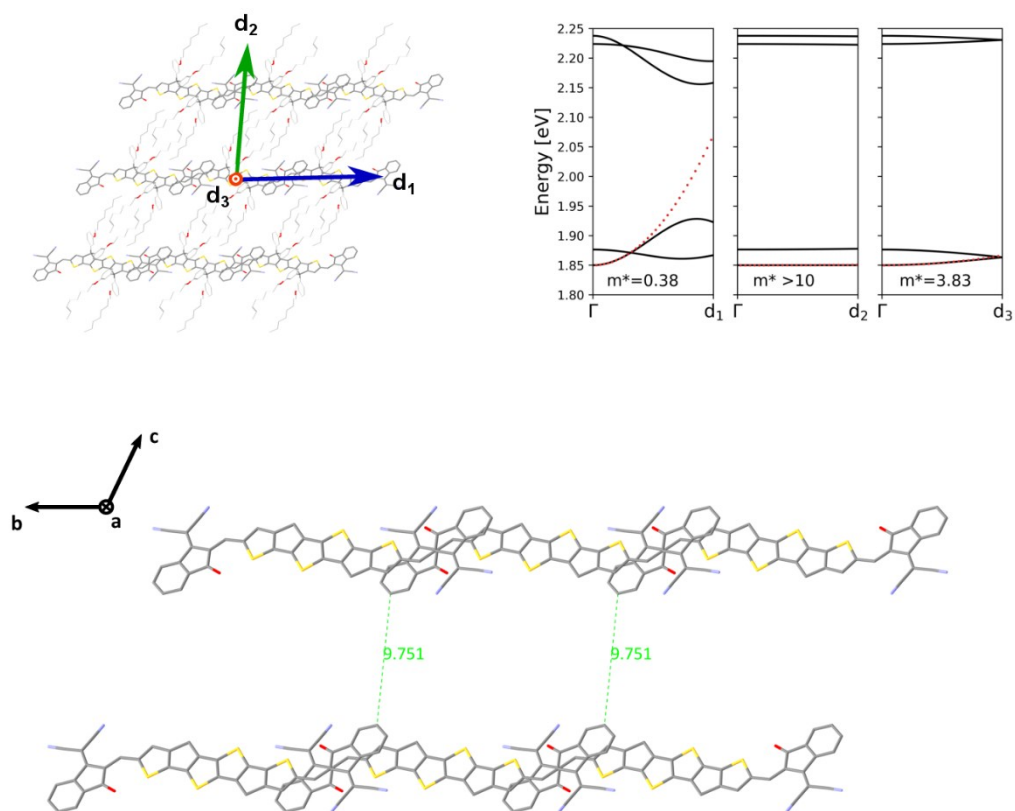

Figure S6 Top: view of the brickwork 2D packing motif of *m*-4TICO with  $d_1$ ,  $d_2$  and  $d_3$  directions superimposed. Calculated conduction band along  $d_1$ ,  $d_2$  and  $d_3$  directions and effective mass are shown. Bottom: shortest distances between non-interconnected molecules are drawn in green. Sidechains, solvent inclusions and hydrogen atoms have been omitted for clarity.

## IDIC

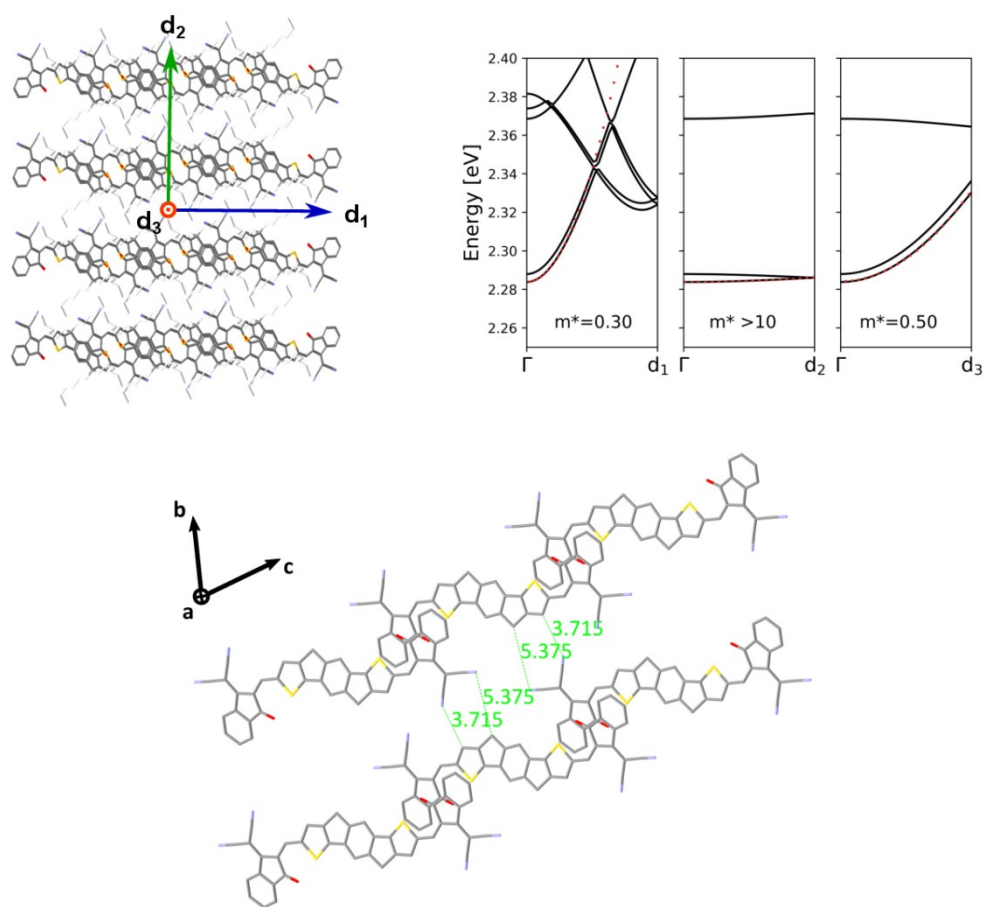

Figure S7 Top: view of the brickwork 2D packing motif of IDIC with  $d_1$ ,  $d_2$  and  $d_3$  directions superimposed. Calculated conduction band along  $d_1$ ,  $d_2$  and  $d_3$  directions and effective mass are shown. Bottom: shortest distances between non-interconnected molecules are drawn in green (Bottom). Sidechains and hydrogen atoms have been omitted for clarity.



# ITN-C9

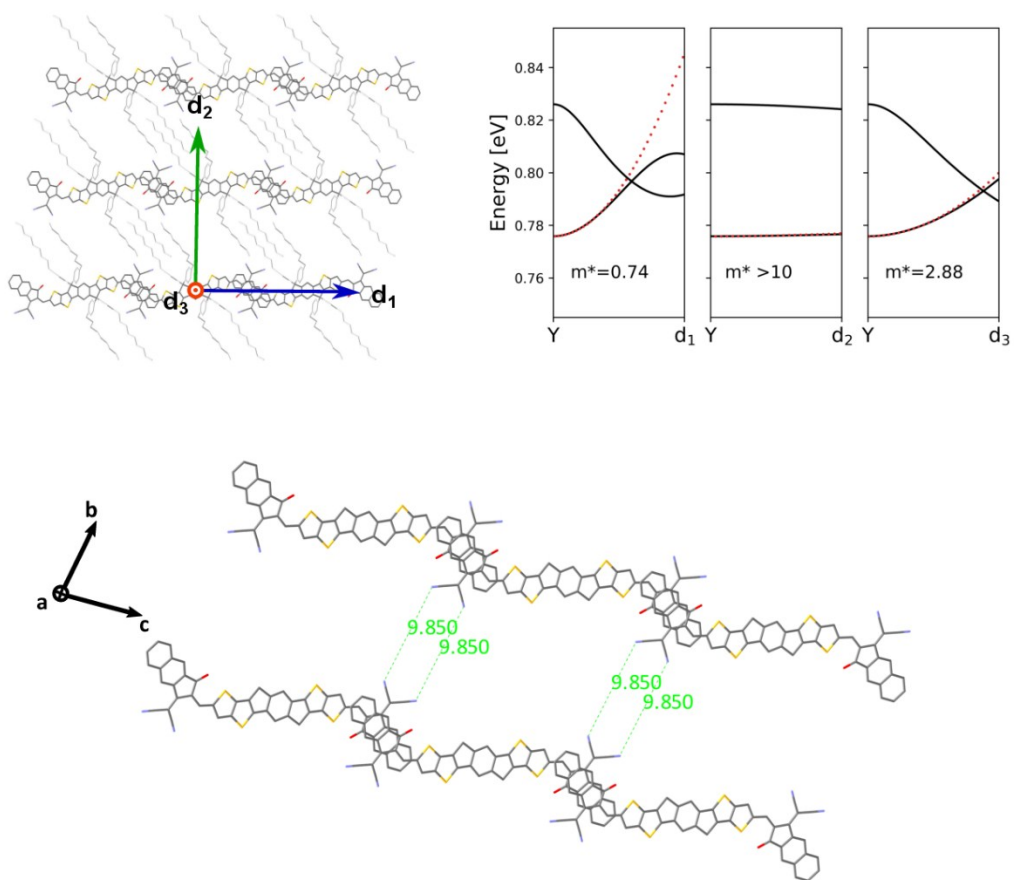

Figure S8 Top: view of the brickwork 2D packing motif of ITN-C9 with  $d_1$ ,  $d_2$  and  $d_3$  directions superimposed. Calculated conduction band along  $d_1$ ,  $d_2$  and  $d_3$  directions and effective mass are shown. Bottom: shortest distances between non-interconnected molecules are drawn in green (Bottom). Sidechains, solvent inclusions and hydrogen atoms have been omitted for clarity.

### 4TIC

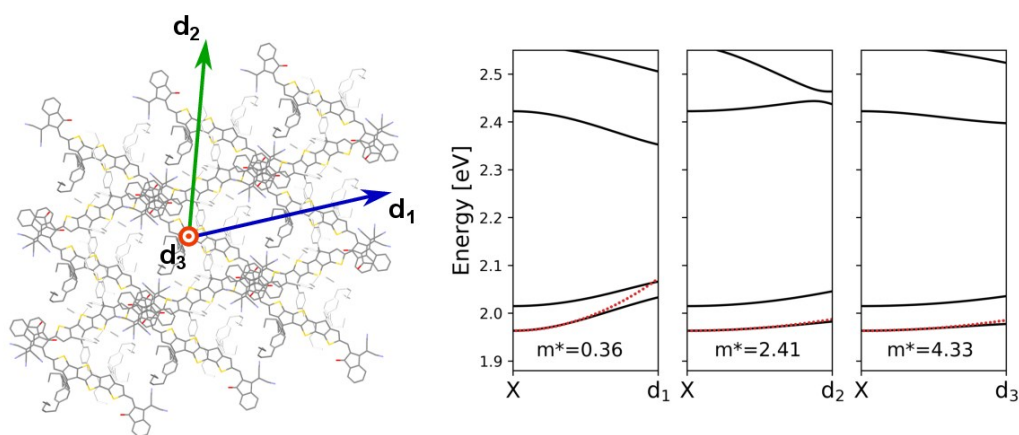

Figure S9 Top view of the reticular 3D packing motif of 4TIC with  $d_1$ ,  $d_2$  and  $d_3$  directions superimposed. Calculated conduction band along  $d_1$ ,  $d_2$  and  $d_3$  directions and effective mass are shown. Solvent inclusions and hydrogen atoms have been omitted for clarity.

### ITCT-DM

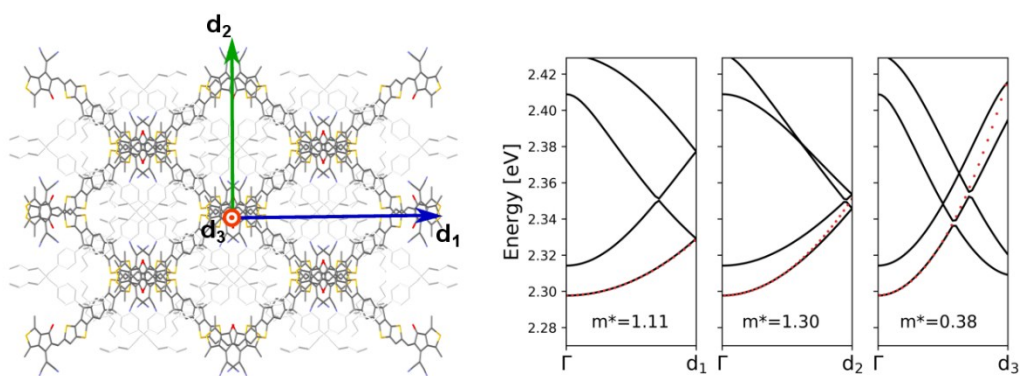

Figure S10 Top view of the reticular 3D packing motif of ITCT-DM with  $d_1$ ,  $d_2$  and  $d_3$  directions superimposed. Calculated conduction band along  $d_1$ ,  $d_2$  and  $d_3$  directions and effective mass are shown. Hydrogen atoms have been omitted for clarity.

### o-IDTBR

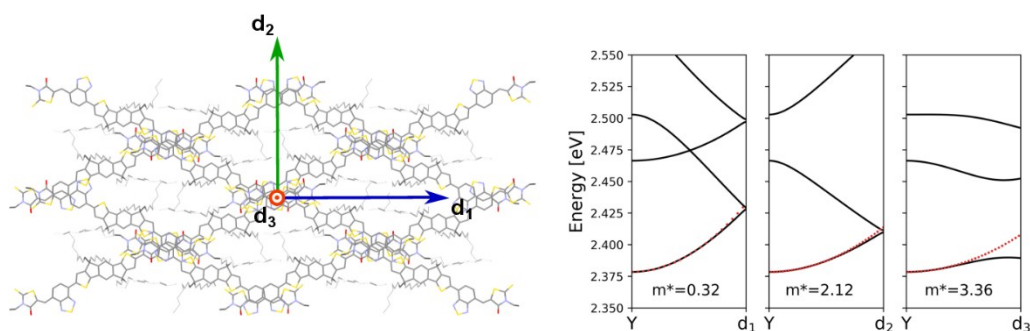

Figure S11 Top view of the reticular 3D packing motif of *o*-IDTBR with  $d_1$ ,  $d_2$  and  $d_3$  directions superimposed. Calculated conduction band along  $d_1$ ,  $d_2$  and  $d_3$  directions and effective mass are shown. Hydrogen atoms have been omitted for clarity.
